# Supplementary material for: Outcomes Associated With a Strategy of Adjuvant Metolazone or High‐Dose Loop Diuretics in Acute Decompensated Heart Failure: A Propensity Analysis
Source: PubMed Central journal article supplement — J Am Heart Assoc. 2018 Sep 8;7(18):e009149. doi: 10.1161/JAHA.118.009149 (PMC6222930; doi:10.1161/jaha.118.009149), 2018-09-08
Supplement: JAH3-7-e009149-s001.pdf [file JAH3-7-e009149-s001.pdf]

# **SUPPLEMENTAL MATERIAL**

**Table S1. Multivariable model of metolazone use utilized for propensity score determination.**

| <b>Covariate</b>                                                                   | <b>OR (95% CI)</b>  | <b>P (Wald)</b> |
|------------------------------------------------------------------------------------|---------------------|-----------------|
| First dose of diuretic on admission in intravenous furosemide equivalents (per mg) | 1.01 (1.007-1.01)   | <0.001          |
| Age at encounter (per year)                                                        | 0.97 (0.96-0.98)    | <0.001          |
| Prior metolazone                                                                   | 3.01 (2.38-3.80)    | <0.001          |
| Blood urea nitrogen (mg/dL)                                                        | 1.01 (1.009-1.02)   | <0.001          |
| Saint Raphael Campus vs. Yale New Haven Hospital                                   | 0.55 (0.46-0.65)    | <0.001          |
| Bridgeport Hospital vs. Yale New Haven Hospital                                    | 0.67 (0.54-0.83)    | <0.001          |
| Arrhythmia                                                                         | 1.85 (1.53-2.25)    | <0.001          |
| Fluid and electrolyte disorders                                                    | 1.72 (1.43-2.07)    | <0.001          |
| Creatinine (mg/dL)                                                                 | 0.86 (0.81-0.93)    | <0.001          |
| Valvular disease                                                                   | 1.44 (1.20-1.73)    | <0.001          |
| Pulmonary circulatory disease                                                      | 1.52 (1.23-1.88)    | <0.001          |
| Chloride (mEq/L)                                                                   | 0.96 (0.93-0.98)    | <0.001          |
| eGFR (ml/min/1.73m <sup>2</sup> )                                                  | 0.99 (0.986-0.996)  | <0.001          |
| Obesity                                                                            | 1.41 (1.16-1.71)    | 0.001           |
| Hemoglobin (g/dL)                                                                  | 0.95 (0.92-0.98)    | 0.002           |
| Drug abuse                                                                         | 0.58 (0.38-0.88)    | 0.011           |
| Sodium (mEq/L)                                                                     | 1.03 (1.01-1.06)    | 0.011           |
| Male sex                                                                           | 1.20 (1.03-1.40)    | 0.017           |
| Diabetes with complications                                                        | 1.33 (1.20-1.68)    | 0.019           |
| Renal failure                                                                      | 1.48 (1.07-2.05)    | 0.019           |
| White blood cell count                                                             | 0.98 (0.97-0.998)   | 0.026           |
| Anemia secondary to blood loss                                                     | 0.54 (0.29-1.01)    | 0.055           |
| Paralysis                                                                          | 0.35 (0.12-1.02)    | 0.055           |
| Hypertension without complications                                                 | 0.79 (0.62-1.02)    | 0.068           |
| Platelet count                                                                     | 0.9993 (0.999-1.00) | 0.068           |

|                                 |                  |       |
|---------------------------------|------------------|-------|
| Lymphoma                        | 1.41 (0.91-2.18) | 0.120 |
| Diabetes without complications  | 1.16 (0.96-1.40) | 0.125 |
| Liver disease                   | 1.22 (0.93-1.61) | 0.150 |
| COPD                            | 0.87 (0.71-1.07) | 0.192 |
| Rheumatologic disease           | 0.80 (0.55-1.17) | 0.257 |
| Solid tumor without metastasis  | 0.78 (0.53-1.20) | 0.277 |
| Neurologic disease              | 0.85 (0.64-1.15) | 0.307 |
| Hypothyroidism                  | 1.10 (0.90-1.35) | 0.339 |
| Elixhauser comorbidity index    | 0.96 (0.87-1.06) | 0.282 |
| Bicarbonate (mEq/L)             | 1.01 (0.99-1.03) | 0.446 |
| Coagulopathy                    | 1.11 (0.83-1.49) | 0.469 |
| Metastatic cancer               | 0.83 (0.45-1.53) | 0.549 |
| Hypertension with complications | 0.98 (0.73-1.33) | 0.910 |
| Readmission                     | 0.99 (0.85-1.17) | 0.940 |

*AUC: 0.8312*

Covariates presented in order of strongest to weakest predictors as determined by the absolute value of the z-score.

COPD: chronic obstructive pulmonary disease; eGFR: estimated glomerular filtration rate

**Table S2. Relationships between metolazone and loop diuretic use with incident hyponatremia, incident hypokalemia and any WRF during heart failure hospitalization.**

| <u>Outcome</u>                 | <u>Metolazone Hazard Ratio (95% CI)</u> | <u>P-Value</u> | <u>Loop Diuretic Hazard Ratio (95% CI)</u> | <u>P-Value</u> |
|--------------------------------|-----------------------------------------|----------------|--------------------------------------------|----------------|
| <b><i>New Hyponatremia</i></b> |                                         |                |                                            |                |
| Univariate                     | 2.50 (1.99-3.15)                        | <0.001         | 1.46 (1.30-1.63)                           | <0.001         |
| Propensity Adjusted            | 2.23 (1.75-2.84)                        | <0.001         | 1.20 (1.05-1.38)                           | 0.008          |
| Propensity and MV Adjusted     | 2.06 (1.59-2.66)                        | <0.001         | 1.14 (0.97-1.34)                           | 0.109          |
|                                |                                         |                |                                            |                |
| <b><i>New Hypokalemia</i></b>  |                                         |                |                                            |                |
| Univariate                     | 2.96 (2.36-3.70)                        | <0.001         | 1.16 (1.03-1.32)                           | 0.017          |
| Propensity Adjusted            | 2.94 (2.34-3.69)                        | <0.001         | 0.96 (0.82-1.12)                           | 0.580          |
| Propensity and MV Adjusted     | 2.99 (2.34-3.81)                        | <0.001         | 0.96 (0.82-1.14)                           | 0.672          |
|                                |                                         |                |                                            |                |
| <b><i>Any WRF</i></b>          |                                         |                |                                            |                |
| Univariate                     | 2.31 (2.00-2.67)                        | <0.001         | 1.28 (1.19-1.37)                           | <0.001         |
| Propensity Adjusted            | 2.50 (2.15-2.90)                        | <0.001         | 1.25 (1.16-1.35)                           | <0.001         |
| Propensity and MV Adjusted     | 2.54 (2.17-2.97)                        | <0.001         | 1.23 (1.13-1.35)                           | <0.001         |

The unadjusted, propensity adjusted and propensity plus multivariable adjusted relationships between metolazone use and incident hyponatremia, incident hypokalemia, and any worsening renal function (WRF) as well as the relationships between increasing doses of loop diuretic are presented above. All metolazone propensity-adjusted analyses are also adjusted for peak loop diuretic dose received in the hospital in intravenous furosemide equivalents as a representation of loop diuretic requirement.

Multivariable models included adjustment for age at encounter, race, sex, arrhythmia, valvular disease,

pulmonary circulatory disease, hypertension with and without complications, chronic obstructive pulmonary disease, diabetes with and without complications, hypothyroidism, renal failure, electrolyte disease, neurologic disease, paralysis, liver disease, lymphoma, malignancy with and without metastasis, rheumatologic disease, coagulopathy, obesity, anemia secondary to blood loss, drug abuse, Elixhauser comorbidity index, prior metolazone use, readmission, as well as baseline laboratory values including sodium, chloride, bicarbonate, blood urea nitrogen, white blood cell count, hemoglobin, platelets, glomerular filtration rate and length of stay. Any WRF was defined as a  $\geq 20\%$  decrease in estimated glomerular filtration rate from admission to the point of worst eGFR during the hospitalization. New hyponatremia was defined as a sodium level  $< 135$  mEq/L and new hypokalemia was defined as a serum potassium  $< 3.5$  mEq/L that developed during the course of the hospitalization (i.e. patients with new electrolyte abnormalities did not meet these criteria at admission). All hazard ratios reported for furosemide are for every 100 mg of intravenous furosemide. MV: multivariable
